# Supplementary material for: Influence of Obesity on Breast Density Reduction by Omega-3 Fatty Acids: Evidence from a Randomized Clinical Trial
Source: Oxford University Press journal article supplement (doi:10.1158/1940-6207.capr-15-0235), 2015-12-29
Supplement: 19406207capr150235-sup-151008_3_supp_data_3249381_nyp5x2.docx [file 19406207capr150235-sup-151008_3_supp_data_3249381_nyp5x2.docx]

**Supplemental Table 1. Baseline and one and two-year follow-up dietary and physical activity characteristics of study participants (mean values ±SD)**

| **Variable** | **Overall** | **Control** | **Raloxifene 60mg** | **Raloxifene 30mg** | **Lovaza 4g** | **Raloxifene 30mg/**  **Lovaza 4g** | **Overall*****  **Difference**  **(p-value)** |
| --- | --- | --- | --- | --- | --- | --- | --- |
| **Dietary**  Energy at Baseline (kcal)  Energy at 12 mo. (Kcal)  Energy at 24 mo. (Kcal)  Energy ∆ (kcal)*  P-value** | 1501 (577)  1461 (604)  1436 (604)  -56 (414)  - | 1440 (588)  1362 (475)  1439 (519)  4 (396)  Referent | 1505 (630)  1518 (772)  1387 (521)  -140 (440)  0.19 | 1612 (651)  1582 (645)  1670 (792)  14 (455)  0.60 | 1425 (540)  1460 (592)  1457 (651)  -27 (364)  0.72 | 1543 (460)  1406 (518)  1454 (502)  141 (423)  0.16 | 0.26 |
| Carbohydrate at Baseline (%kcal)  Carbohydrate at 12 mo. (%Kcal)  Carbohydrate at 24 mo. (%Kcal)  Carbohydrate ∆ (%kcal)*  P-value** | 50.2 (8.6)  49.9 (8.5)  49.8 (8.2)  -0.3 (6.7)  - | 50.2 (8.5)  50.4 (9.1)  50.5 (8.3)  0.0 (6.2)  Referent | 49.3 (9.3)  48.9 (9.5)  49.6 (8.2)  -0.1 (7.0)  0.80 | 50.3 (8.1)  49.8 (8.4)  49.5 (8.1)  -0.7 (5.2)  0.55 | 51.8 (8.4)  49.9 (7.7)  48.7 (8.2)  -2.3 (6.5)  0.07 | 49.2 (8.9)  50.4 (7.9)  50.7 (8.5)  1.7 (8.1)  0.36 | 0.10 |
| Fat at Baseline (%kcal)  Fat at 12 mo. (%Kcal)  Fat at 24 mo. (%Kcal)  Fat ∆ (%kcal)*  P-value** | 33.3 (6.8)  33.7 (7.0)  33.6 (6.6)  0.1 (5.8)  - | 33.6 (6.6)  33.4 (6.9)  33.0 (6.6)  -0.3 (5.6)  Referent | 33.0 (7.7)  32.6 (7.8)  31.7 (6.5)  -0.7 (5.7)  0.59 | 32.7 (5.8)  34.3 (7.0)  34.2 (5.1)  0.9 (4.7)  0.23 | 32.4 (6.7)  33.8 (6.7)  34.3 (7.6)  1.4 (6.0)  0.19 | 34.9 (7.1)  34.6 (6.6)  34.5 (6.5)  -0.9 (6.7)  0.74 | 0.32 |
| Protein at Baseline (%kcal)  Protein at 12 mo. (%Kcal)  Protein at 24 mo. (%Kcal)  Protein ∆ (%kcal)*  P-value** | 16.6 (3.0)  16.3 (2.8)  16.4 (2.8)  -0.2 (2.5)  - | 16.5 (2.6)  16.3 (2.7)  16.2 (3.1)  -0.3 (2.6)  Referent | 16.8 (3.3)  16.3 (3.0)  16.7 (2.6)  -0.1 (2.8)  0.34 | 16.6 (2.5)  16.0 (2.6)  16.2 (2.8)  -0.3 (2.3)  0.99 | 16.3 (3.0)  16.8 (2.9)  17.0 (2.8)  0.3 (2.3)  0.12 | 16.6 (3.4)  16.1 (3.0)  16.0 (2.9)  -0.5 (2.3)  0.82 | 0.33 |
| n-3FA at baseline (g)  n-3FA at 12 mo. (g)  n-3FA at 24 mo. (g)  n-3FA ∆ (g)*  P-value** | 1.18 (0.64)  1.17 (0.65)  1.14 (0.55)  -0.06 (0.42)  - | 1.15 (0.58)  1.13 (0.53)  1.10 (0.47)  -0.05 (0.39)  Referent | 1.19 (0.65)  1.15 (0.73)  1.06 (0.55)  -0.10 (0.43)  0.63 | 1.24 (0.70)  1.26 (0.63)  1.31 (0.59)  0.00 (0.46)  0.08 | 1.13 (0.72)  1.16 (0.70)  1.12 (0.58)  -0.02 (0.41)  0.62 | 1.19 (0.57)  1.16 (0.66)  1.12 (0.54)  -0.15 (0.43)  0.42 | 0.13 |
| n-6FA at baseline (g)  n-6FA at 12 mo. (g)  n-6FA at 24 mo. (g)  n-6FA ∆ (g)*  P-value** | 11.8 (7.2)  11.9 (7.2)  11.5 (6.2)  -0.6 (5.7)  - | 11.2 (6.1)  10.7 (5.5)  11.3 (6.2)  0.3 (4.8)  Referent | 11.5 (7.0)  12.0 (9.0)  10.5 (5.7)  -0.8 (4.5)  0.49 | 12.4 (7.0)  13.4 (7.6)  13.2 (6.2)  0.0 (5.0)  0.27 | 11.7 (9.8)  11.8 (7.7)  11.7 (7.1)  -0.3 (6.9)  0.84 | 12.1 (5.4)  11.7 (6.1)  10.8 (5.5)  -2.0 (6.3)  0.18 | 0.17 |
| n-3FA:n-6FA BL (ratio) baseline  n-3FA:n-6FA 12 mo.  n-3FA:n-6FA 24 mo.  n-3FA:n-6FA ∆*  P-value** | 0.11 (0.03)  0.11 (0.04)  0.11 (0.03)  0.00 (0.03)  - | 0.11 (0.03)  0.11 (0.04)  0.11 (0.04)  0.00 (0.03)  Referent | 0.11 (0.03)  0.10 (0.02)  0.11 (0.03)  0.00 (0.03)  0.79 | 0.11 (0.05)  0.11 (0.08)  0.11 (0.05)  0.00 (0.02)  0.76 | 0.10 (0.03)  0.10 (0.03)  0.11 (0.03)  0.00 (0.02)  0.95 | 0.10 (0.03)  0.10 (0.02)  0.11 (0.04)  0.00 (0.03)  0.37 | 0.88 |
| **Overall physical activity**  Baseline (Mets/d)  12 months (Mets/d)  24 months (Mets/d)  Activity ∆ (Mets/d)*  P-value** | 819 (1126)  792 (817)  779 (779)  -60 (1120)  - | 643 (552)  801 (692)  760 (710)  100 (820)  Referent | 608 (509)  849 (1066)  710 (506)  59 (474)  0.91 | 1123 (1399)  749 (764)  817 (715)  -670 (1887)  0.44 | 755 (822)  725 (727)  782 (860)  115 (901)  0.78 | 956 (1735)  848 (880)  818 (983)  -36 (1064)  0.49 | 0.87 |

*Change (∆) is calculated as 24 mo. – Baseline

**Test of the change over time (baseline to 24 mo.) with the selected group compared to the control group (referent).

***Overall test of difference over time (baseline to 24 mo.) across groups.
