# Supplementary material for: Influence of Obesity on Breast Density Reduction by Omega-3 Fatty Acids: Evidence from a Randomized Clinical Trial
Source: Oxford University Press journal article supplement (doi:10.1158/1940-6207.capr-15-0235), 2015-12-29
Supplement: 19406207capr150235-sup-151008_3_supp_data_3249382_nyp5x2.docx [file 19406207capr150235-sup-151008_3_supp_data_3249382_nyp5x2.docx]

Supplemental Table 2: Correlation between baseline demographics and percent versus absolute breast density with and without adjustment for BMI

| Variables | % Breast Density | |  | Corrected by BMI | |  | Absolute breast density | |  | Corrected by BMI | |
| --- | --- | --- | --- | --- | --- | --- | --- | --- | --- | --- | --- |
|  |  | |  | % Breast Density | |  |  | |  | Absolute breast density | |
|  | Rho | p value |  | Rho | P value |  | Rho | P-value |  | Rho | P-value |
| Age | -0.14 | **0.019** |  | -0.16 | **0.011** |  | -0.07 | 0.243 |  | -0.10 | 0.208 |
| BMI | -0.49 | **2.2 e-16** |  |  |  |  | +0.42 | **8.66 e-13** |  |  |  |
| Waist:hip ratio | -0.32 | **1.61 e-07** |  | -0.31 | **<0.0001** |  | +0.22 | **3.32 e-4** |  | +2.37 | **0.0001** |
| Number of births | -0.13 | **0.033** |  | -0.15 | **0.016** |  | -0.14 | **0.024** |  | -0.12 | **0.047** |
| Age at first child birth | +0.24 | **4.44e-04** |  | +0.52 | **0.0004** |  | +0.07 | 0.297 |  | +0.51 | **0.039** |
| Family history of breast cancer | +0.01 | 0.920 |  | +0.02 | 0.834 |  | +0.03 | 0.640 |  | -0.03 | 0.927 |
| Previous biopsies | +0.11 | 0.066 |  | +0.09 | 0.142 |  | +0.04 | 0.566 |  | +0.08 | 0.158 |

Statistically significant correlations are in **bold** characters
